# Supplementary material for: A non-coding GWAS variant impacts anthracycline-induced cardiotoxic phenotypes in human iPSC-derived cardiomyocytes
Source: PubMed Central journal article supplement (PMC9684507; doi:10.1038/s41467-022-34917-y), 2022-11-22
Supplement: 41467_2022_34917_MOESM2_ESM.pdf [file 41467_2022_34917_MOESM2_ESM.pdf]

**Supplementary Movie 1:** Representative live beating video of iPSC-CMs of rs28714259 G/G genotype in control condition.

**Supplementary Movie 2:** Representative live beating video of iPSC-CMs of rs28714259 G/G genotype 24h after 1  $\mu$ M doxorubicin treatment.

**Supplementary Movie 3:** Representative live beating video of iPSC-CMs of rs28714259 G/G genotype 24h after 1  $\mu$ M doxorubicin treatment. Cells were pre-treated with 100nM dexamethasone before doxorubicin exposure.

**Supplementary Movie 4:** Representative live beating video of iPSC-CMs of rs28714259 A/A genotype in control condition.

**Supplementary Movie 5:** Representative live beating video of iPSC-CMs of rs28714259 A/A genotype 24h after 1  $\mu$ M doxorubicin treatment.

**Supplementary Movie 6:** Representative live beating video of iPSC-CMs of rs28714259 A/A genotype 24h after 1  $\mu$ M doxorubicin treatment. Cells were pre-treated with 100nM dexamethasone before doxorubicin exposure.
